# Supplementary material
Source: Royal Society of Chemistry journal article supplement (doi:10.1039/d5en00970g)
Supplement: d5en00970g1.pdf [file d5en00970g1.pdf]

## Supplementary Information

Fe<sub>3</sub>O<sub>4</sub> nanoenzymes as a novel plant growth promoter for enhancing salt tolerance in cucumber seedlings: integrated analysis of growth physiology and transcriptional metabolism

Dan Xu,<sup>†a</sup> Bin Sheng,<sup>†a,b</sup> Zhi-Hao Lin,<sup>a</sup> Xiao-Bin Wen,<sup>a,b</sup> Xue-Ling Ye,<sup>\*b</sup> Zhi-Yong Liu,<sup>b</sup> Ge

Chen,<sup>a</sup> Jun Lv,<sup>a</sup> Dong-Hui Xu,<sup>\*a</sup> Lin Qin,<sup>a</sup> Xiao-Min Xu,<sup>a</sup> and Guang-Yang Liu<sup>\*a</sup>

<sup>a</sup> State Key Laboratory of Vegetable Biobreeding, Institute of Vegetables and Flowers, Chinese Academy of Agricultural Sciences, Key Laboratory of Vegetables Quality and Safety Control, Ministry of Agriculture and Rural Affairs of China, Beijing 100081, China

<sup>b</sup> Horticulture College, Shenyang Agricultural University, Shenyang 110866, China

\*Corresponding author: Xue-Ling Ye (yexueling@syau.edu.cn), Dong-Hui Xu (xudonghui@caas.cn) and Guang-Yang Liu (liuguangyang@caas.cn).

### **Text S1. Detection of POD activity of Fe<sub>3</sub>O<sub>4</sub> NPs.**

Fe<sub>3</sub>O<sub>4</sub> NPs exhibit inherent peroxidase-like enzyme activity under acidic pH conditions, and this enzymatic activity constitutes the fundamental mechanism driving the oxidation of substrates (e.g., TMB). During this process, Fe<sub>3</sub>O<sub>4</sub> NPs can catalyze the decomposition of H<sub>2</sub>O<sub>2</sub>, leading to the oxidation of TMB from a colorless state to a blue product. This oxidized form exhibits strong ultraviolet absorption at 650 nm.

Buffer solution preparation: Mix 0.3 mL of glacial acetic acid and 525 mL of deionized water by vortex, then add 750 μL of 1 M NaOH. Finally, obtain 10 μM of buffer solution with pH=4.

There are a total of 6 treatments as follows:

1. Buffer solution (3 mL) + TMB (100 μL) + H<sub>2</sub>O<sub>2</sub> (100 μL) + Fe<sub>3</sub>O<sub>4</sub> NPs (100 μL);
2. Buffer solution (3 mL) + TMB (100 μL) + H<sub>2</sub>O<sub>2</sub> (100 μL) + deionized water (100 μL);
3. Buffer solution (3 mL) + TMB (100 μL) + Fe<sub>3</sub>O<sub>4</sub> NPs (100 μL) + deionized water (100 μL);
4. Buffer solution (3 mL) + H<sub>2</sub>O<sub>2</sub> (100 μL) + Fe<sub>3</sub>O<sub>4</sub> NPs (100 μL) + deionized water (100 μL);
5. Buffer solution (3 mL) + TMB (100 μL) + deionized water (100 μL);
6. Buffer solution (3 mL) + Fe<sub>3</sub>O<sub>4</sub> NPs (100 μL) + deionized water (100 μL).

Prepare six treatment groups using 5-mL centrifuge tubes. Observe the color change in Treatment 1, and after 15 minutes, transfer a droplet of the mixed solution onto a UV-Vis spectrophotometer to measure the absorbance change.

## **Text S2. Transcriptome analysis method**

RNA was extracted by ethanol precipitation method, and total RNA was identified and quantified using Qubit fluorescence quantifier and Qsep400 high-throughput biological fragment analyzer. mRNA with polyA tails was enriched through Oligo (dT) magnetic beads. fragmentation buffer was added to use the short fragments interrupted by RNA as templates. The first strand of cDNA was synthesized using six-base random primers. The second strand of cDNA was synthesized by adding buffer solution, dNTPs and DNA polymerase. After purifying the double-stranded cDNA using DNA purification magnetic beads, the end was repaired and the sequencing connector was connected. The inserted fragments of 250-350bp were selected and PCR enrichment was performed to obtain the final cDNA library. After the library construction was completed, the quality of the library was detected. The Qubit dye method was used for preliminary quantification, and the fragment size was detected using a fragment analyzer. After the library inspection was qualified, different libraries were pooled according to the requirements of effective concentration and target offline data volume for Illumina sequencing, and 150bp paired end readings were generated. Quality control was carried out on the sequencing data to remove low-quality sequences and connector sequences. After alignment the high-quality sequences to the reference genome and obtaining the differentially expressed genes, GO functional significance and KEGG significance analyses were conducted.

## **Text S3. Metabolome analysis method**

The biological samples were placed in a freeze dryer (Scientz-100F) for vacuum freeze-

drying for 63 hours and ground into powder using a grinder (MM400, Retsch). Weigh 50 mg of the sample and add 1.2 mL of 70% methanol water pre-cooled at -20 °C as the internal standard extract. After centrifugation, the supernatant was aspirated. The sample was filtered through a 0.22 µm filter membrane and stored in an injection bottle for liquid chromatography-mass spectrometry (UPLC-MS) analysis. Based on OPLS-DA (Orthogonal Partial least squares discriminant Analysis), differential metabolites are selected according to the multiple relationship of metabolite content of samples with different treatments being greater than 1. Subsequently, a significance analysis of KEGG pathways was performed on the identified differential metabolites.

## Supplemental Figures

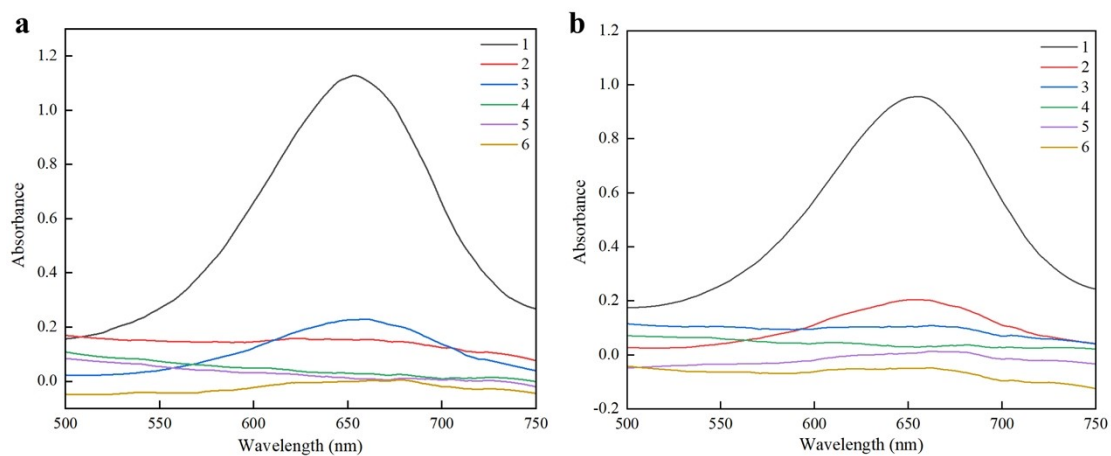

**Fig. S1** Changes of POD activity absorbance in FNPs and FNPs-G.

Note: 1, 2, 3, 4, 5, and 6 in the figure represent different treatment groups respectively (The detection method of POD activity of  $\text{Fe}_3\text{O}_4$  NPs in Text S1)

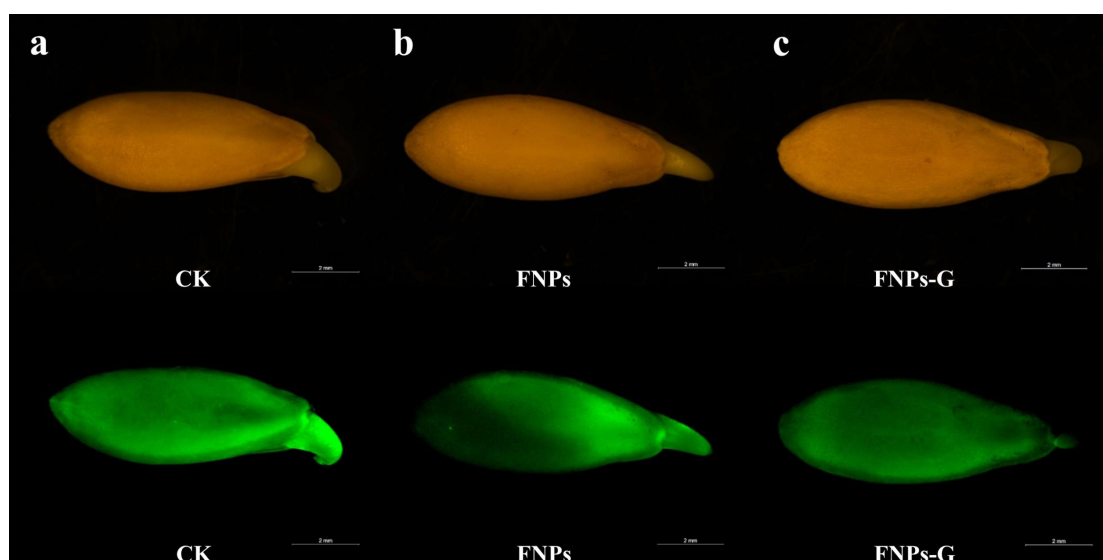

**Fig. S2** Visualization of reactive oxygen species in cucumber seeds. (a-c) They respectively represent the images of bright field and dark field imaging under a fluorescence microscope after seed soaking treatments of CK, FNPs and FNPs-G.

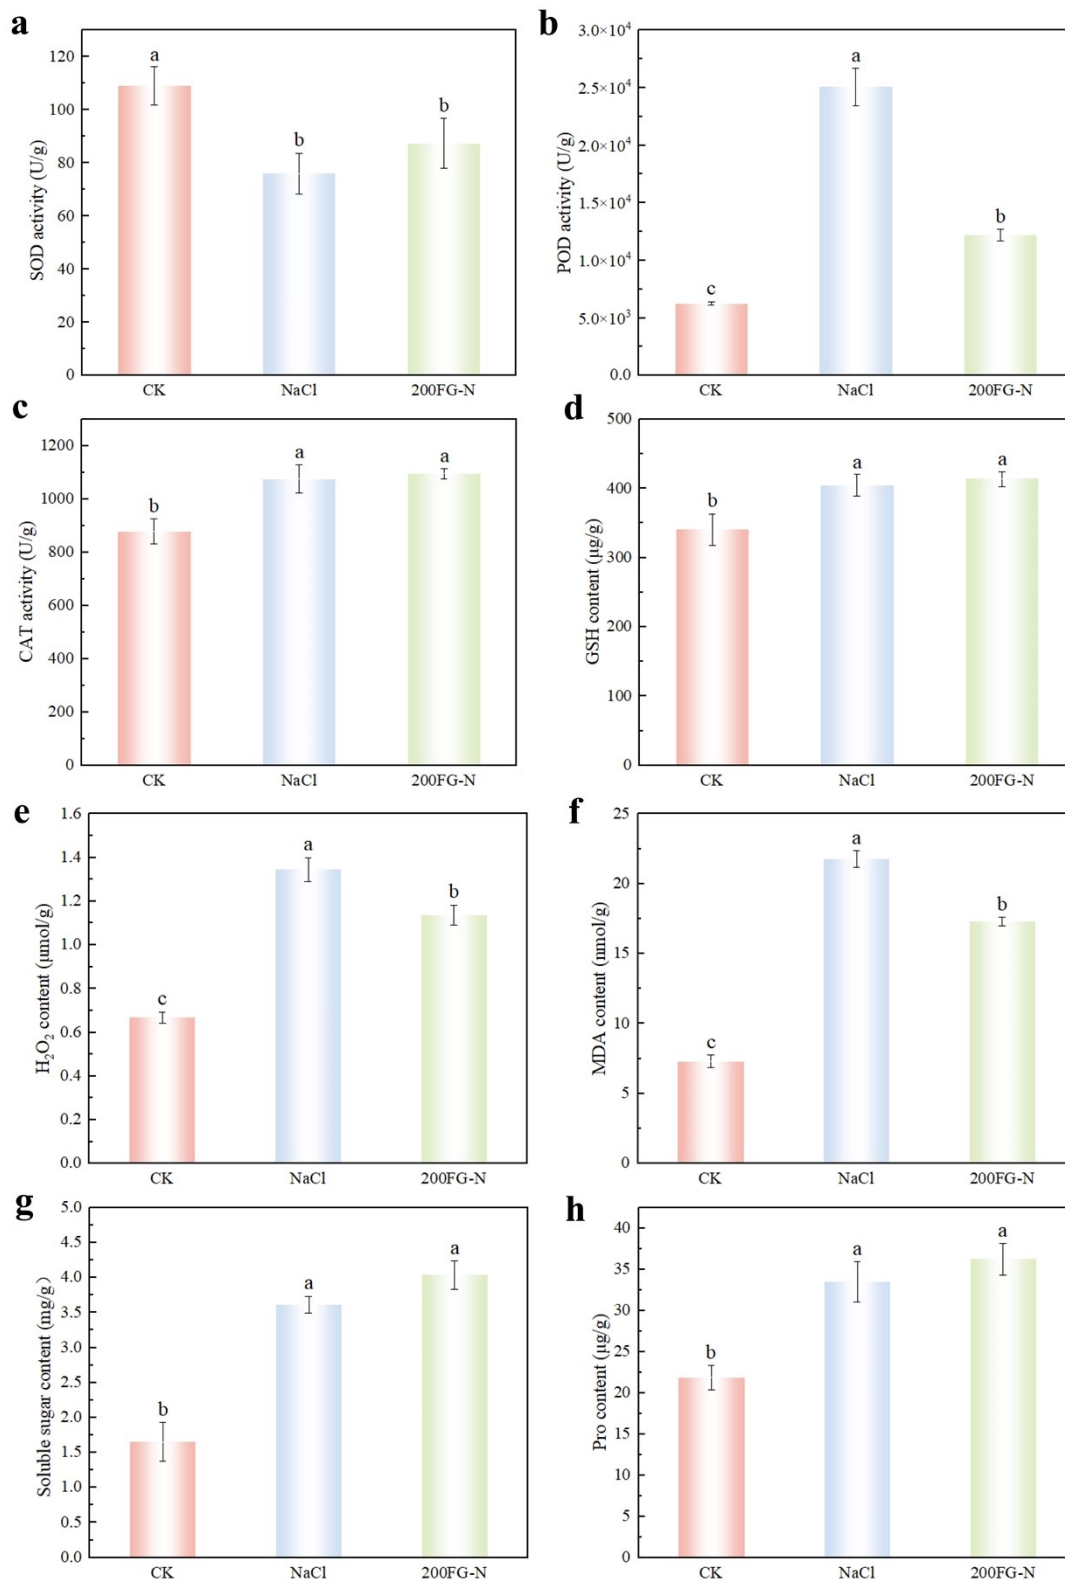

**Fig. S3** The effects of 200 mg L<sup>-1</sup> FNPs-G seed soaking treatment on physiological parameters of cucumber seedlings under salt stress, including (a) SOD activity, (b) POD activity, (c) CAT activity, (d) GSH content, (e) H<sub>2</sub>O<sub>2</sub> content, (f) MDA content, (g) soluble sugar content and (h) Pro content. The images and charts shown represent at least three independent biological experiments. Statistical comparisons were conducted using univariate ANOVA. The letters denote statistical significance with respect to untreated seeds ( $P \leq 0.05$ ).

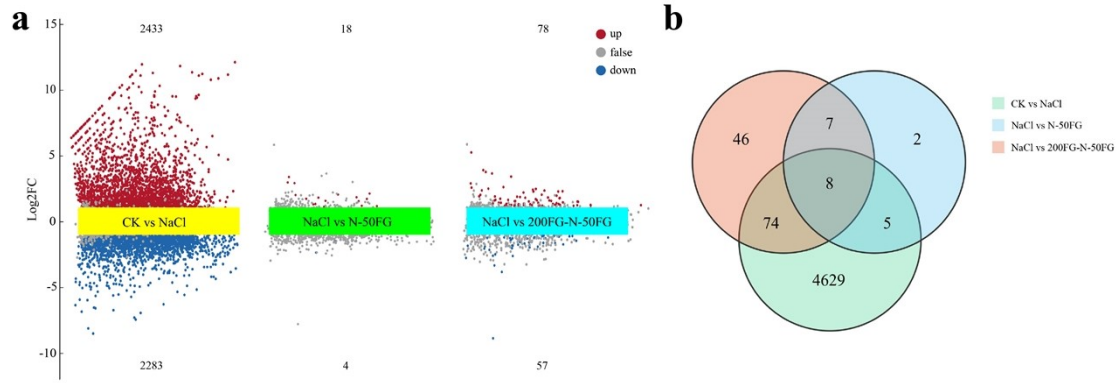

**Fig. S4** (a) Quantity of genes exhibiting upregulation and downregulation in the CK vs NaCl, NaCl vs N-50FG and NaCl vs 200FG-N-50FG groups. (b) Venn diagram.

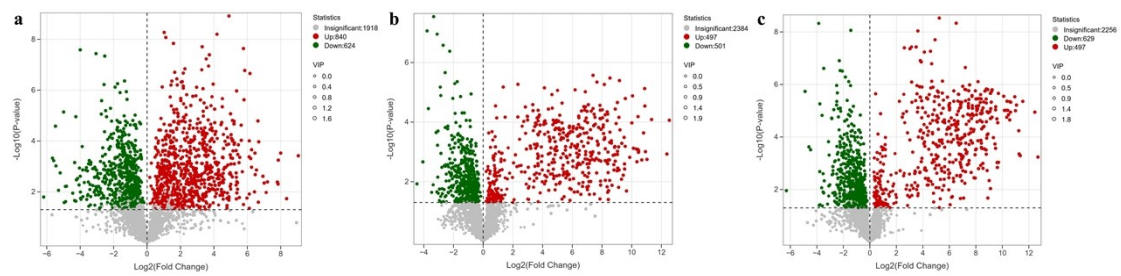

**Fig. S5** Volcano plots of differential metabolites of (a) CK vs NaCl, (b) NaCl vs N-50FG, and (c) NaCl vs 200FG-N-50FG.

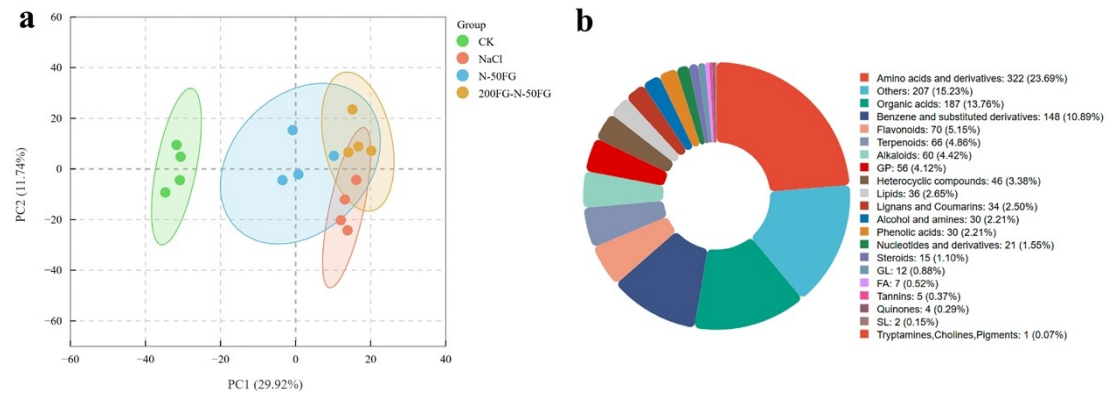

**Fig. S6** (a) PCA scatter plots comparing different treatments. (b) Circular diagram illustrating metabolite classes.

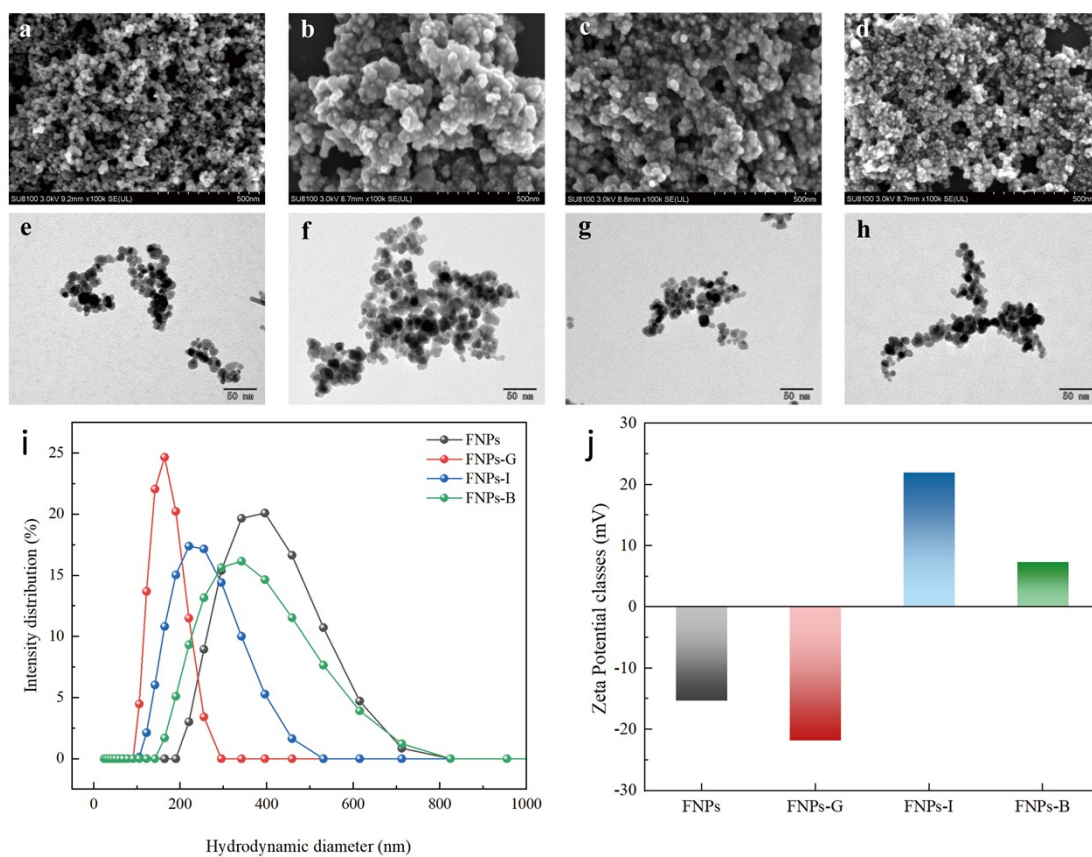

**Fig. S7** SEM (a-d), TEM (e-h), Hydrodynamic diameter (i) and Zeta potential (j) characterization of  $\text{Fe}_3\text{O}_4$  NPs

Note:  $\text{Fe}_3\text{O}_4$  NPs includes FNP, FNP-G, FNP-I, and FNP-B, the same below.

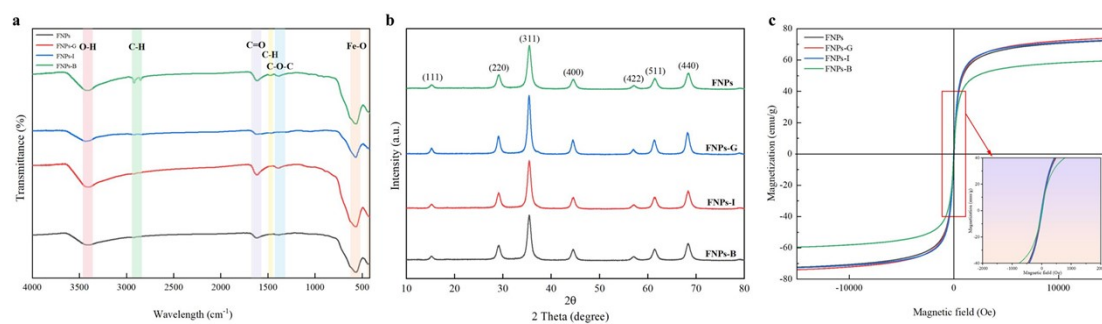

**Fig. S8** FTIR (a), XRD (b) and magnetization curve (c) characterization of  $\text{Fe}_3\text{O}_4$  NPs

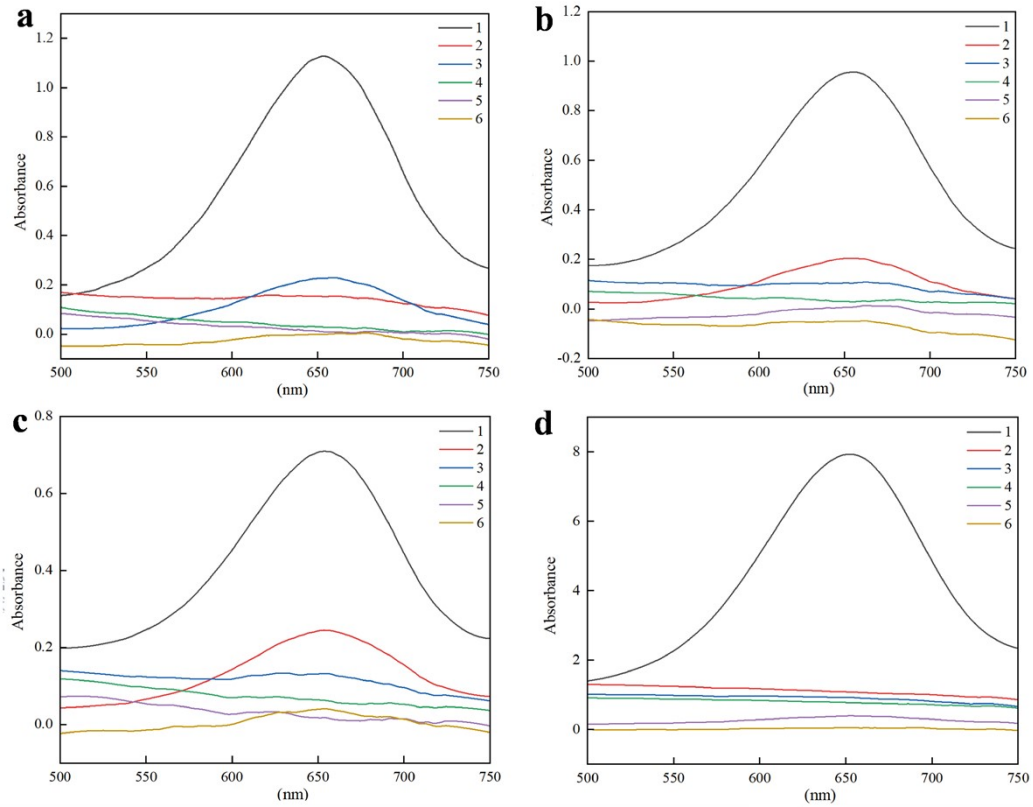

**Fig. S9** Changes of POD activity absorbance in Fe<sub>3</sub>O<sub>4</sub> NPs

Note: 1, 2, 3, 4, 5, and 6 in the figure represent different treatment groups respectively (POD activity detection of Fe<sub>3</sub>O<sub>4</sub> nanoenzymes in the test method). a, b, c, and d stand for FNPs, FNPs-G, FNPs-I, and FNPs-B respectively.

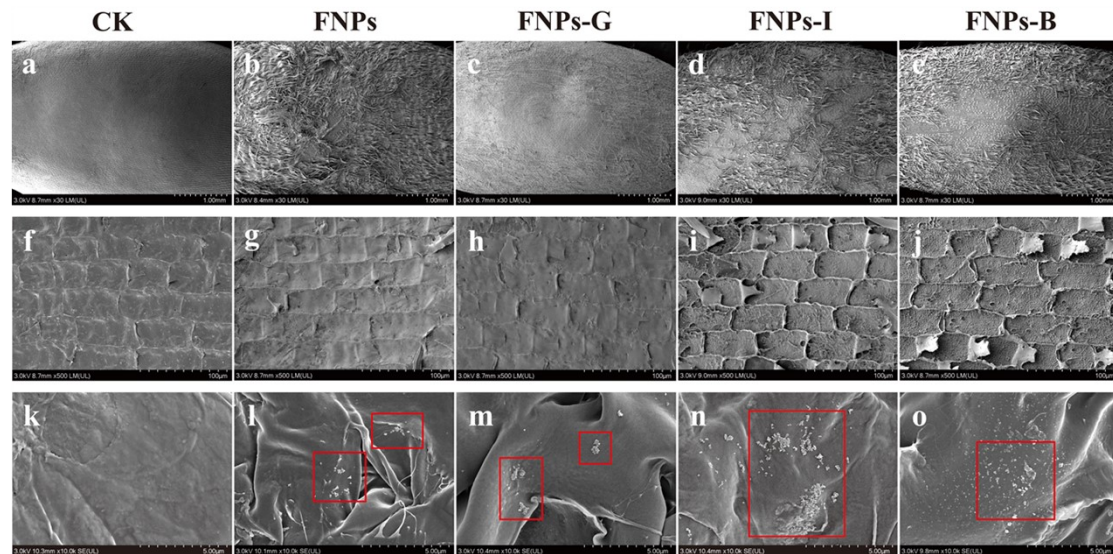

**Fig. S10** SEM images of Fe<sub>3</sub>O<sub>4</sub> NPs inside the epidermis and seed coat of cucumber seeds

Note: a-e represents the effect of different treatments on cucumber seed skin, the scale is 1 mm; f-j represents the effect of different treatments on the cell wall of cucumber seeds with a scale of 100 μm. k-o represents the presence of Fe<sub>3</sub>O<sub>4</sub> NPs observed in the interior of cucumber seed coat on a scale of 5 μm.

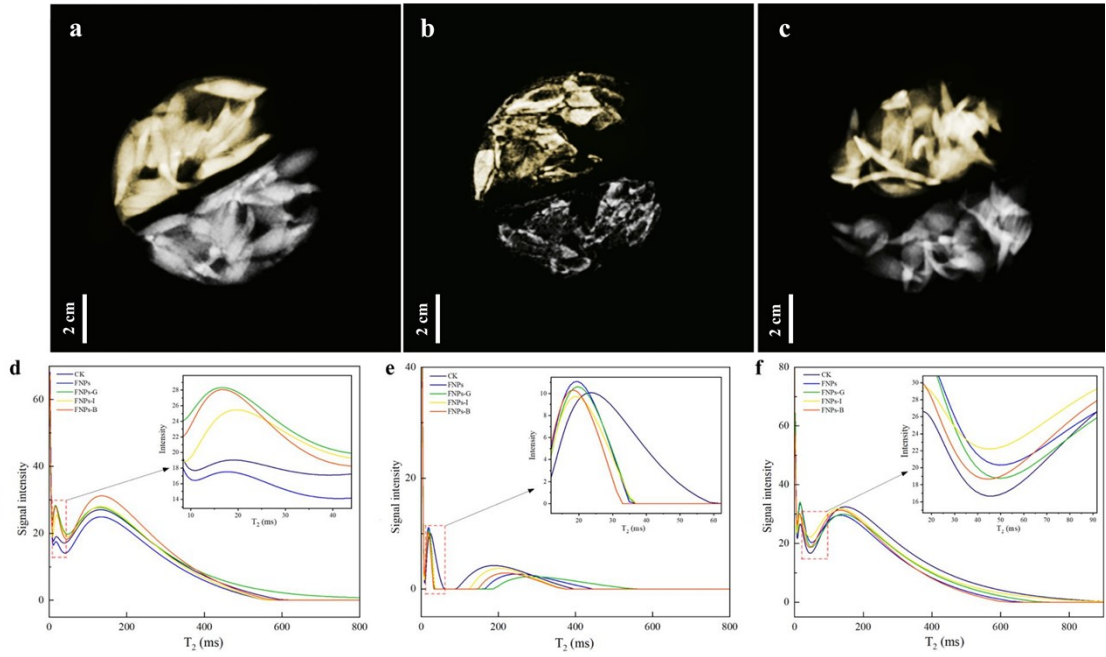

**Fig. S11** Seed (a), seed coat (b), and endosperm (c) represent 2D central axial sections; the signal intensity of seed (d), seed coat (e) and endosperm (f) after soaking with 100 mg/L Fe<sub>3</sub>O<sub>4</sub> NPs as a function of T<sub>2</sub> relaxation time (ms)

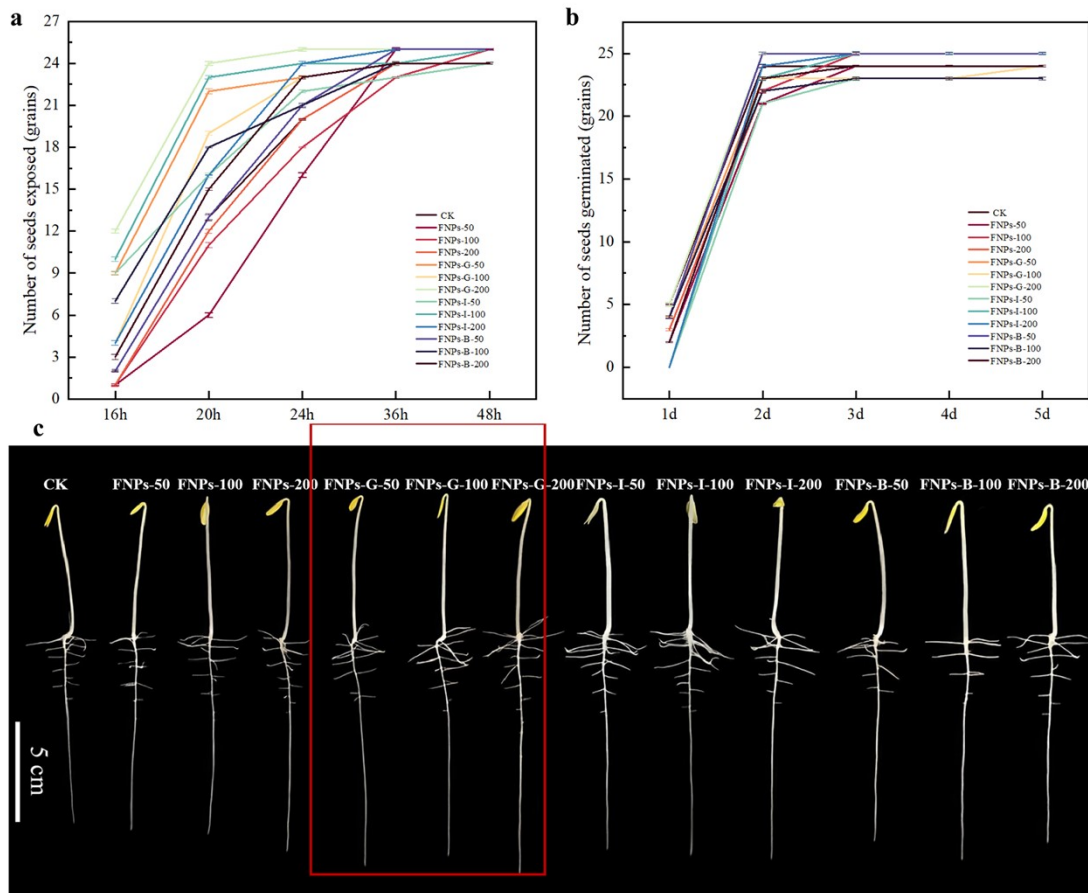

**Fig. S12** Trends in the number of cucumber seed dews and germination over time (a,b); Images of

cucumber seedlings on day 5 after different Fe<sub>3</sub>O<sub>4</sub> NPs and different concentrations of seed immersion treatments (c)

Note: a stand for the variation trend of cucumber seed whitening quantity during 16 h-48 h after soaking with different concentrations of FNPs, FNPs-G, FNPs-I and FNPs-B; b represents the trend chart of germination number of cucumber seeds after soaking with different concentrations of FNPs, FNPs-G, FNPs-I and FNPs-B for 1 d to 5 days.

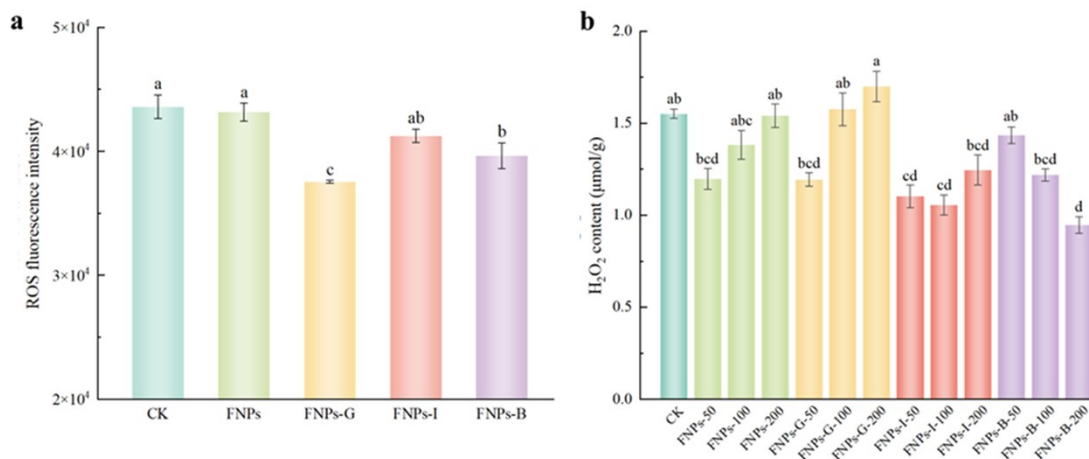

**Fig. S13** ROS fluorescence intensity (a) and Effects of different concentrations on H<sub>2</sub>O<sub>2</sub> content in seedlings soaked with Fe<sub>3</sub>O<sub>4</sub> NPs (b)

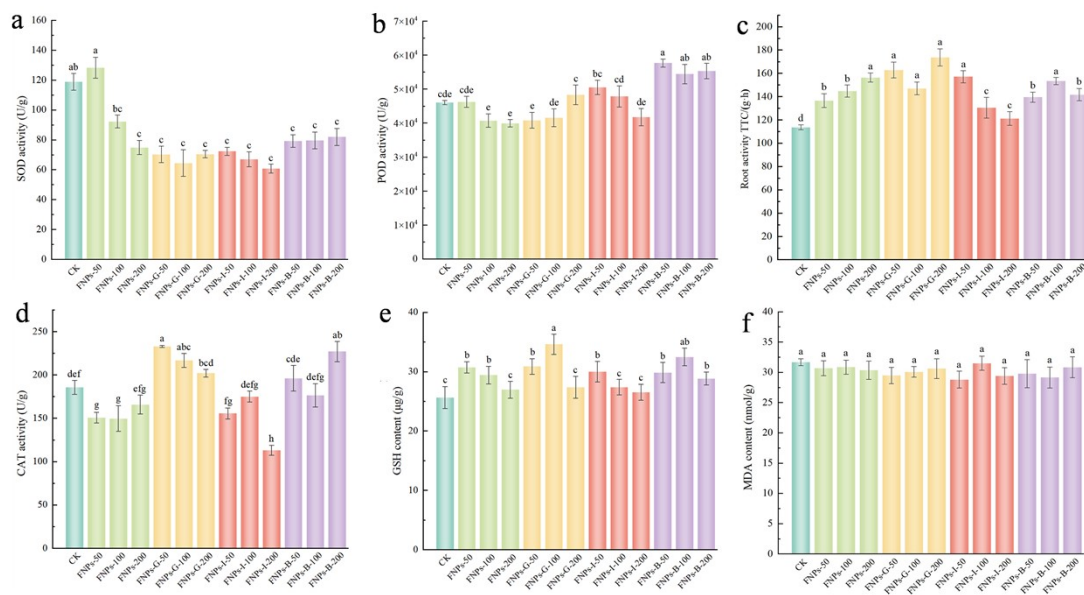

**Fig. S14** Effects of different concentrations of Fe<sub>3</sub>O<sub>4</sub> NPs on antioxidant system of seedlings (a,b,d,e); Effects of different concentrations of Fe<sub>3</sub>O<sub>4</sub> NPs on root activity of cucumber (c); Effect of seed dipping with different concentrations of Fe<sub>3</sub>O<sub>4</sub> NPs on MDA content of cucumber seedlings (f)

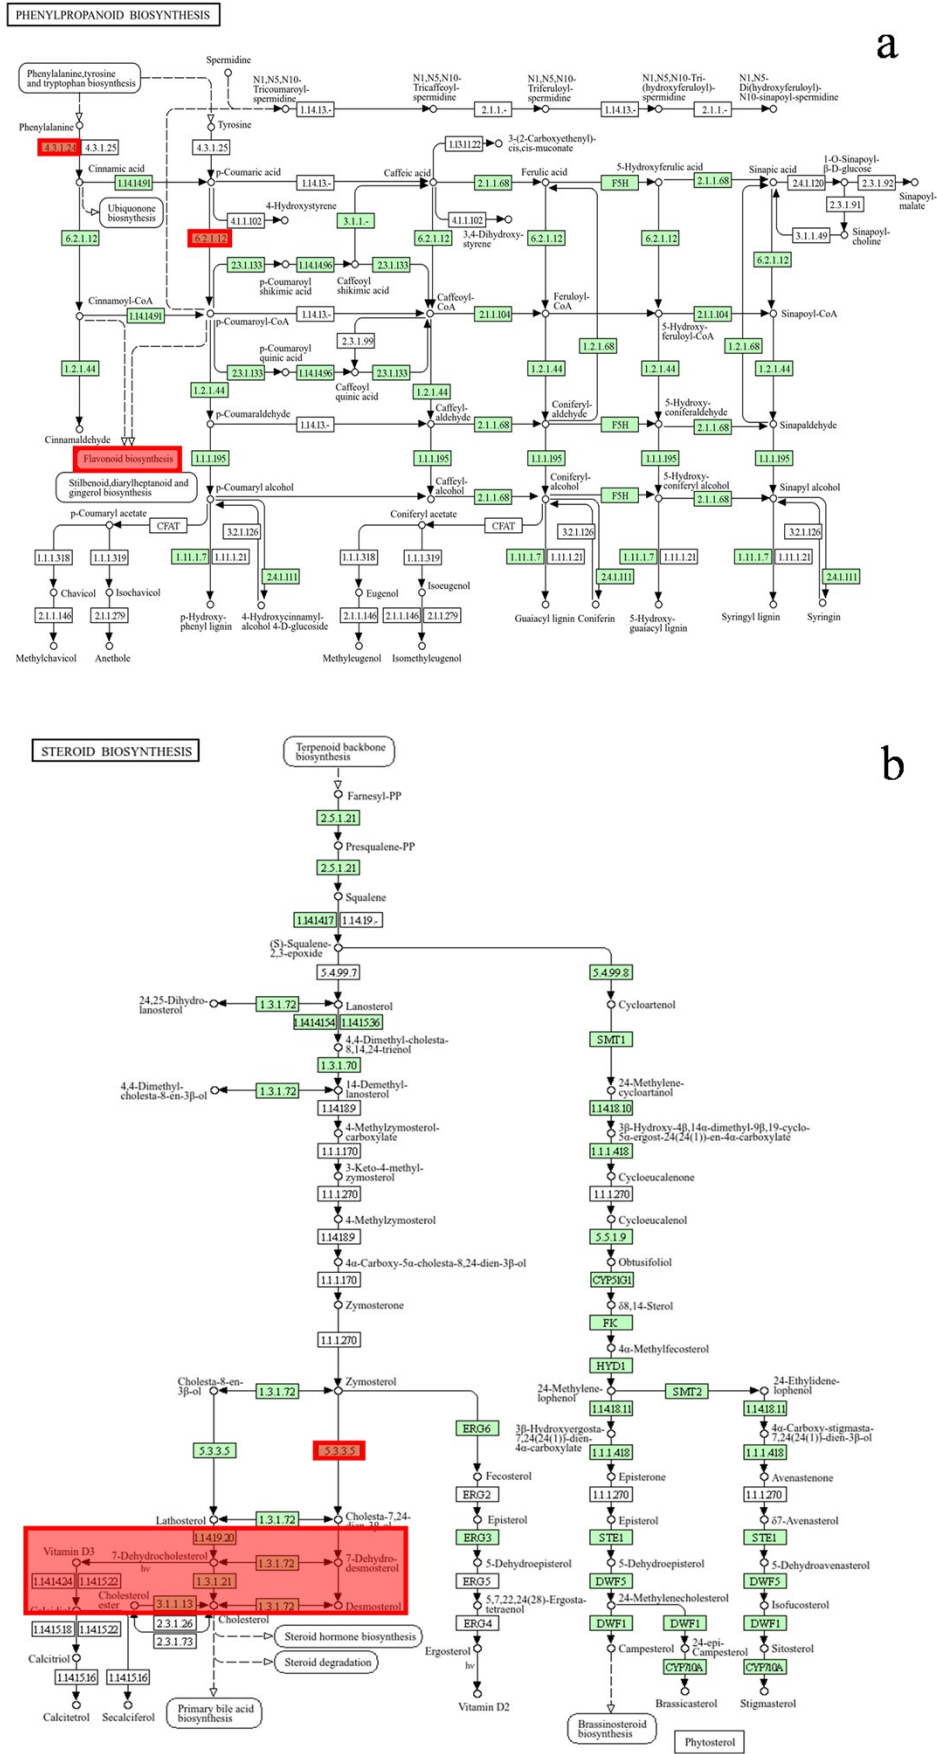

Fig. S15 KEGG pathway map of phenylpropanoid biosynthesis (a) and steroid biosynthesis (b).

Note: (a) Phenylpropanoid biosynthesis pathway (ko00940). Red circles indicate upregulated enzymes under FNPs-G treatment: PAL (phenylalanine ammonia-lyase, EC 4.3.1.24), 4CL (4-coumarate-CoA ligase, EC 6.2.1.12), and CHS (chalcone synthase, EC 2.3.1.74, corresponding to module M00137). (b) Steroid biosynthesis pathway (ko00100). The red shaded area indicates the downstream region containing key upregulated enzymes, including SMT (sterol 24-C-methyltransferase, EC 2.1.1.41) and EBP (sterol 8,7-isomerase, EC 5.3.3.5). Original KEGG maps are available at <https://www.kegg.jp/pathway/ko00940> and <https://www.kegg.jp/pathway/ko00100>.

## Supplemental Tables

**Table S1.** Sample sequencing data quality summary

| Sample         | Raw Reads | Clean Reads | Q20(%) | Q30(%) | Reads mapped     |
|----------------|-----------|-------------|--------|--------|------------------|
| CK-1           | 60896734  | 55756586    | 97.53  | 93.7   | 53816279(96.52%) |
| CK-2           | 47958288  | 43499668    | 97.52  | 93.6   | 41946257(96.43%) |
| CK-3           | 48985092  | 44539948    | 97.52  | 93.57  | 42967803(96.47%) |
| CK-4           | 48696464  | 44077092    | 97.49  | 93.51  | 42519882(96.47%) |
| NaCl-1         | 50769922  | 45240444    | 97.42  | 93.39  | 43567797(96.30%) |
| NaCl-2         | 69965202  | 63576750    | 97.47  | 93.49  | 61316872(96.45%) |
| NaCl-3         | 59374136  | 54247578    | 97.45  | 93.48  | 52277533(96.37%) |
| NaCl-4         | 60959198  | 55290400    | 97.49  | 93.61  | 53274062(96.35%) |
| N-50FG-1       | 54305878  | 49724410    | 97.43  | 93.48  | 47841090(96.21%) |
| N-50FG-2       | 49433464  | 43573324    | 97.47  | 93.52  | 42026717(96.45%) |
| N-50FG-3       | 48643870  | 43905088    | 97.54  | 93.61  | 42402428(96.58%) |
| N-50FG-4       | 51597498  | 47707824    | 97.61  | 93.75  | 46187739(96.81%) |
| 200FG-N-50FG-1 | 52889218  | 47009474    | 97.5   | 93.58  | 45296256(96.36%) |
| 200FG-N-50FG-2 | 63365828  | 58102972    | 97.45  | 93.48  | 55981641(96.35%) |
| 200FG-N-50FG-3 | 58987724  | 52635918    | 97.49  | 93.55  | 50754187(96.43%) |
| 200FG-N-50FG-4 | 55653772  | 49884456    | 97.52  | 93.56  | 48107060(96.44%) |

**Table S2.** Effects of different concentrations of NaCl on the growth of cucumber seedlings

| NaCl<br>(mmol/L) | Fresh<br>weight<br>(g) | Dry<br>weight<br>(g) | Plant<br>height<br>(cm) | Root<br>length<br>(cm) | Chlorophyll<br>content<br>(SPAD) | Nitrogen<br>content<br>(mg/kg) |
|------------------|------------------------|----------------------|-------------------------|------------------------|----------------------------------|--------------------------------|
| 0                | 7.532                  | 0.241                | 2.92                    | 27.64                  | 41.29                            | 15.71                          |
| 50               | 8.843                  | 0.317                | 2.9                     | 30.79                  | 44.52                            | 16.74                          |
| 100              | 6.578                  | 0.24                 | 3.56                    | 28.34                  | 44.06                            | 16.58                          |
| 150              | 4.687                  | 0.182                | 3.7                     | 28.81                  | 33.44                            | 13.22                          |
| 200              | 2.897                  | 0.115                | 2.74                    | 23.06                  | 31.37                            | 12.58                          |

**Table S3.** Correlation analysis of physiological parameters in cucumber seedlings under FNPs-G treatment

| Parameter                     | CK      | NaCl    | N-50FG  | 200FG-N  | 200FG<br>-N-<br>50FG | Correlation<br>coefficient<br>with H <sub>2</sub> O <sub>2</sub> | Correlation<br>coefficient<br>with MDA | Correlation<br>coefficient<br>with T-AOC |
|-------------------------------|---------|---------|---------|----------|----------------------|------------------------------------------------------------------|----------------------------------------|------------------------------------------|
| SOD<br>(U/g)                  | 109.09  | 76.02   | 42.15   | 87.35    | 67.08                | r = 0.13                                                         | r = 0.04                               | r = -0.10                                |
| POD<br>(U/g)                  | 6236.07 | 25078.2 | 34613.6 | 12207.53 | 16101.4              | r = -0.93*                                                       | r = -0.93*                             | r = -0.43                                |
| CAT<br>(U/g)                  | 878.58  | 1075.79 | 1263.35 | 1095.85  | 1152.47              | r = -0.86                                                        | r = -0.89*                             | r = -0.66                                |
| GSH                           | 340.58  | 404.49  | 442.17  | 413.77   | 425.51               | r = -0.61                                                        | r = -0.67                              | r = -0.71                                |
| H <sub>2</sub> O <sub>2</sub> | 0.67    | 1.34    | 1.01    | 1.14     | 1.07                 | 1                                                                | r = 0.98**                             | r = 0.36                                 |
| MDA                           | 7.29    | 21.75   | 14.4    | 17.29    | 14.78                | r = 0.98**                                                       | 1                                      | r = 0.26                                 |
| Proline                       | 21.86   | 33.46   | 51.74   | 36.24    | 48.91                | r = -0.60                                                        | r = -0.60                              | r = -0.62                                |
| Soluble<br>sugar              | 1.65    | 3.61    | 5.16    | 4.04     | 4.51                 | r = -0.55                                                        | r = -0.58                              | r = -0.73                                |
| T-AOC                         | 2.28    | 2.55    | 2.22    | 1.82     | 2.3                  | r = 0.36                                                         | r = 0.26                               | 1                                        |

Note: Data are presented as mean  $\pm$  SD (n=3). Different lowercase letters indicate significant differences among treatments at  $p < 0.05$ . Correlation coefficients (r) were calculated based on treatment means (n=5). \* $p < 0.05$ , \*\* $p < 0.01$  (two-tailed test). Unmarked correlations are not significant ( $p \geq 0.05$ ).
